# Supplementary material
Source: PubMed Central journal article supplement (PMC9420160)
Supplement: NIHMS1786685-supplement-Supp1.pdf [file NIHMS1786685-supplement-Supp1.pdf]

**Supplemental Table 1. Associations between smokers' EVALI awareness and e-cigarette risk perceptions**

| Perceived risk of e-cigarettes compared to smoking cigarettes: | Heard of EVALI |             |             |             |
|----------------------------------------------------------------|----------------|-------------|-------------|-------------|
|                                                                | yes            |             | no/not sure |             |
|                                                                | %              | 95% CI      | %           | 95% CI      |
| Less harmful than smoking                                      | 14.4           | (10.4-18.4) | 10.1        | (7.2-13.0)  |
| About as harmful as smoking                                    | 38.7           | (33.7-43.7) | 41.8        | (36.2-47.3) |
| More harmful than smoking                                      | 26.6           | (22.3-30.9) | 16.8        | (13.0-20.5) |
| Don't know                                                     | 20.3           | (16.2-24.4) | 31.4        | (26.3-36.4) |
| Chi Square p-value                                             | <b>0.0002</b>  |             |             |             |
