# Supplementary material
Source: PubMed Central journal article supplement (PMC9420160)
Supplement: NIHMS1786685-supplement-Supp2.pdf [file NIHMS1786685-supplement-Supp2.pdf]

**Supplemental Table 2. Association between EVALI knowledge and perceived impact of EVALI on e-cigarette interest, among smokers aware of EVALI (n=542)**

|                                                            | Perceived Impact of EVALI on Future E-cigarette Interest |             |                                                 |            |                                                       |             | pvalue           |
|------------------------------------------------------------|----------------------------------------------------------|-------------|-------------------------------------------------|------------|-------------------------------------------------------|-------------|------------------|
|                                                            | Less interested in using e-cigarettes in future          |             | More interested in using e-cigarettes in future |            | No effect on interest in using e-cigarettes in future |             |                  |
|                                                            | %                                                        | 95% CI      | %                                               | 95% CI     | %                                                     | 95% CI      |                  |
| <b>Believed main cause of EVALI was:</b>                   |                                                          |             |                                                 |            |                                                       |             |                  |
| E-cigarettes used to vape nicotine, like JUUL              | 58.4                                                     | (52.4-64.3) | 1.0                                             | (0.0-2.2)  | 40.6                                                  | (34.7-46.5) | <b>&lt;.0001</b> |
| Vaping products used for vaping marijuana/THC              | 34.9                                                     | (25.8-44.0) | 9.2                                             | (2.2-16.3) | 55.8                                                  | (46.1-65.6) |                  |
| Both were responsible                                      | 48.2                                                     | (41.4-54.9) | 1.7                                             | (0.0-3.4)  | 50.2                                                  | (43.4-56.9) |                  |
| I don't know                                               | 35.0                                                     | (27.3-42.8) | 3.3                                             | (0.3-6.2)  | 61.7                                                  | (53.7-69.7) |                  |
| <b>Heard of Vitamin E Acetate as associated with EVALI</b> |                                                          |             |                                                 |            |                                                       |             |                  |
| Yes                                                        | 48.5                                                     | (41.4-55.7) | 3.9                                             | (0.3-7.4)  | 47.6                                                  | (40.5-54.7) | 0.85             |
| No                                                         | 46.9                                                     | (41.7-52.1) | 2.3                                             | (0.6-4.1)  | 50.8                                                  | (45.6-56.0) |                  |
| Not sure                                                   | 45.8                                                     | (38.0-53.5) | 3.1                                             | (0.5-5.7)  | 51.1                                                  | (43.2-59.0) |                  |

Note: Read as row percentages. P-values are based on bivariate Chi-square tests of association between EVALI knowledge and perceived impact variables
